# Supplementary material for: Single-nucleotide and long-patch base excision repair of DNA damage in plants
Source: PubMed Central journal article supplement (PMC2954439; doi:10.1111/j.1365-313x.2009.03994.x), 2009-09-01
Supplement: tpj0060-0716-SD1.pdf [file tpj0060-0716-SD1.pdf]

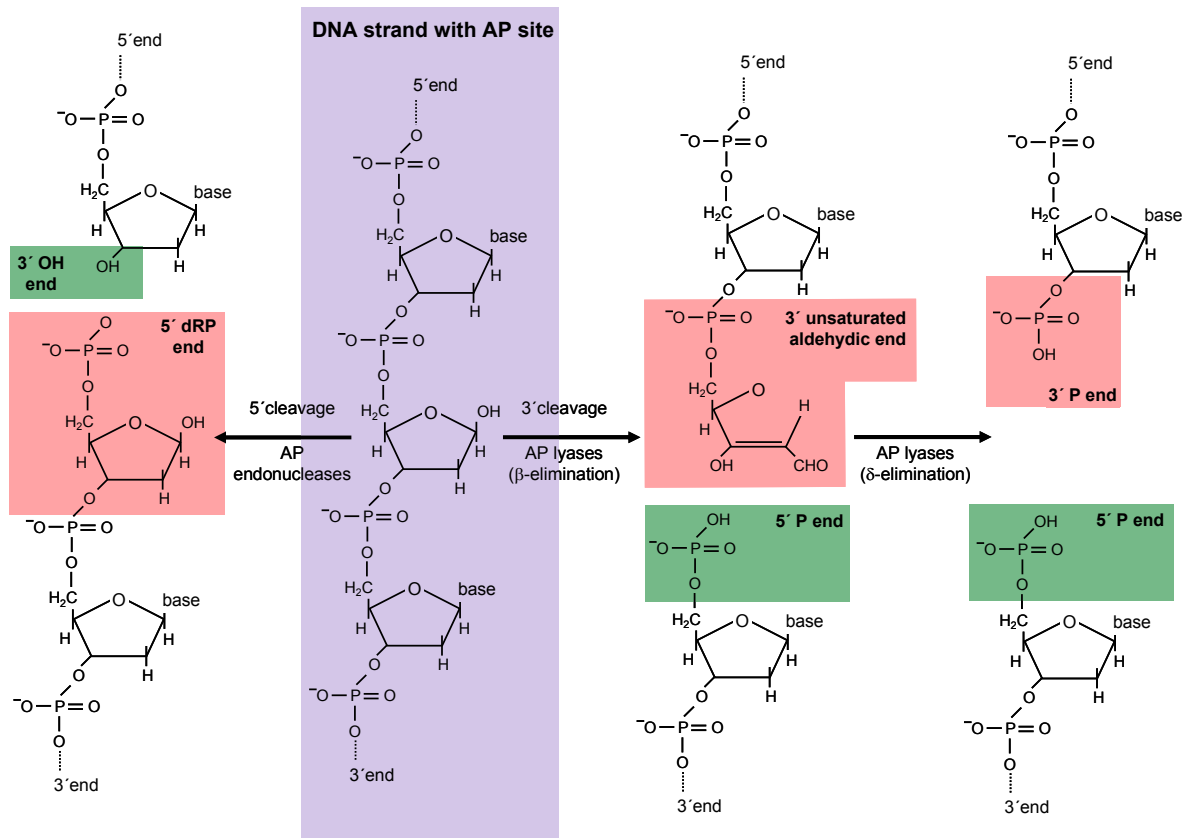

**Figure S1. DNA ends generated after AP site cleavage by AP endonucleases and AP lyases.** Cleavage by AP endonucleases takes place at the 5' side of the AP site and yields a 3'-OH end and a 5'-deoxyribose-5-phosphate (5'-dRP) terminus. By contrast AP lyases cleave 3' to the AP site through a  $\beta$ -elimination mechanism, leaving a 5'-phosphate end and a 3'- $\alpha,\beta$ -unsaturated aldehyde; in some cases, they additionally perform a  $\delta$ -elimination event that generates a 3'-phosphate end [Adapted from: Boiteux, S. and Guillet, M. (2004) Abasic sites in DNA: repair and biological consequences in *Saccharomyces cerevisiae*. *DNA Repair (Amst)*, 3, 1-12.]
