# Supplementary material for: Single-nucleotide and long-patch base excision repair of DNA damage in plants
Source: PubMed Central journal article supplement (PMC2954439; doi:10.1111/j.1365-313x.2009.03994.x), 2009-09-01
Supplement: tpj0060-0716-SD2.pdf [file tpj0060-0716-SD2.pdf]

**Table S1.** DNA sequence of oligonucleotides used as substrates.

| Name    | DNA sequence <sup>a</sup>                                     | Strand | Label <sup>b</sup> |
|---------|---------------------------------------------------------------|--------|--------------------|
| FI-UGF  | TCACGGGATCAATGTGTTCTTTCAGCTC <b>U</b> GGTCACGCTGACCAGGAATACC  | Upper  | FI at 5'           |
| UGF-FI  | TCACGGGATCAATGTGTTCTTTCAGCTC <b>U</b> GGTCACGCTGACCAGGAATACC  | Upper  | FI at 3'           |
| FI-APGF | TCACGGGATCAATGTGTTCTTTCAGCTC <b>F</b> GGTCACGCTGACCAGGAATACC  | Upper  | FI at 5'           |
| CGR     | AGTGCCCTAGTTACACAAGAAAGTCGAG <b>G</b> CCAGTGC GACTGGTCCTTATGG | Lower  | -                  |
| AI-CGR  | AGTGCCCTAGTTACACAAGAAAGTCGAG <b>G</b> CCAGTGC GACTGGTCCTTATGG | Lower  | AI at 5'           |

<sup>a</sup>F = AP site analog (tetrahydrofuran)

<sup>b</sup>FI = fluorescein; AI = alexa fluor 647
